# Supplementary material
Source: PubMed Central journal article supplement (PMC5647183)

## **Supporting Information Figure Legends**

### **Supporting Information Figure S1. Glucose levels in metabolic test expressed as percentage of basal glucose.**

(A) Circulating T4 levels in fed conditions. Age = 13 weeks.  $n = 7$  untreated;  $n = 8$  T4-treated. (B) Glucose concentration in blood during the OGTT expressed as the percentage of basal (time 0) glucose.  $n = 13$  per group. (C) Glucose concentration in blood during the IPPTT expressed as the percentage of basal glucose.  $n = 7$  untreated;  $n = 8$  T4-treated. (D) Glucose concentration in blood during the ITT expressed as the percentage of basal glucose.  $n = 12$  untreated;  $n = 13$  T4-treated. (E) Glucose concentration in blood during a 24-hour fasting period expressed as the percentage of basal glucose.  $n = 7$  untreated;  $n = 8$  T4-treated. (F) Homeostatic assessment of insulin resistance (HOMA-IR) index. Age = 12 weeks.  $n = 7$  untreated;  $n = 8$  T4-treated. UT: Untreated; T4: T4-treated. Data are represented as the mean  $\pm$  SEM. \*  $p < 0.05$  compared to untreated mice. A  $t$ -test two tailed was applied to panels A and F. A Mann-Whitney Rank Sum test was applied to panels B-E.

### **Supporting Information Figure S2. Energy intake and histology of the thyroid and the pituitary of in T4-treated mice.**

(A) Energy intake divided by body weight.  $n = 7$  untreated;  $n = 8$  T4-treated. (B) Representative images of the histological analysis of the thyroid and pituitary of T4-treated and untreated mice. Thyroid;  $n = 6$  untreated;  $n = 7$  T4-treated. Pituitary;  $n = 5$  untreated;  $n = 6$  T4-treated. (C) Determination of the  $\alpha$ -GSU of pituitary hormones in the serum of T4-treated and untreated mice.  $n = 7$  untreated;  $n = 8$  T4-treated. UT: Untreated; T4: T4-treated. Data are represented as the mean  $\pm$  SEM. \*  $p < 0.05$  compared to untreated mice (t-test two tailed).

### **Supporting Information Figure S3. The subcellular localization of MAFA and FOXO1 is not affected by T4 supplementation.**

(A) Pancreatic islets were isolated from animals treated or not with T4. Determination of messenger RNA (mRNA) levels of genes involved in pancreatic islet metabolism. Values were normalized to islets isolated from untreated mice.  $n = 6$  untreated;  $n = 5$  T4-treated. (B) Representative images of MAFA and insulin (INS) immunofluorescence staining in pancreases from mice treated or not with T4. Scale bar = 50  $\mu$ m.  $n = 5$  per group. (C) Representative images of FOXO1 and INS immunofluorescence staining in pancreases from mice treated or not with T4. Scale bar = 50  $\mu$ m.  $n = 5$  per group. UT:

Untreated; T3: T3-treated; T4: T4-treated. Data are represented as the mean  $\pm$  SEM. \*  $p < 0.05$  compared to untreated mice ( $t$ -test two tailed).

**Supplementary Figure 4. T4 induces a starvation-like state in the skeletal muscle.**

(A) Western blots indicating activation of AKT in the skeletal muscle and the liver of T4-treated mice. Mice were fasted for 16 hours and then injected with insulin (0.75 UI.kg<sup>-1</sup> of body weight) 15 minutes prior euthanization.  $n = 5$  untreated;  $n = 6$  T4-treated. (B) Determination of mRNA levels of genes involved in energy metabolism in the skeletal muscle of mice treated or not with T4. Values were normalized to untreated mice. GLUT2;  $n = 5$  untreated,  $n = 6$  T4-treated. GK;  $n = 5$  untreated,  $n = 6$  T4-treated. G6Pase;  $n = 5$  untreated,  $n = 6$  T4-treated. LPK;  $n = 5$  untreated,  $n = 6$  T4-treated. PEPCK;  $n = 5$  untreated,  $n = 6$  T4-treated. GAPDH;  $n = 6$ . LDH;  $n = 5$  untreated,  $n = 6$  T4-treated. PGC1 $\alpha$ ;  $n = 6$ . PGC1 $\beta$ ;  $n = 6$ . UCP2;  $n = 5$ . SREBP1c;  $n = 5$  untreated,  $n = 6$  T4-treated. (C) Determination of mRNA levels of genes involved in energy metabolism in the liver of mice treated or not with T4. Values were normalized to untreated mice. GLUT2;  $n = 5$  untreated,  $n = 6$  T4-treated. GK;  $n = 5$ . G6Pase;  $n = 5$  untreated,  $n = 6$  T4-treated. LPK;  $n = 5$  untreated,  $n = 6$  T4-treated. PEPCK;  $n = 5$  untreated,  $n = 6$  T4-treated. GAPDH;  $n = 6$  untreated,  $n = 5$  T4-treated. LDH;  $n = 5$ . PGC1 $\alpha$ ;  $n = 5$  untreated,  $n = 6$  T4-treated. PGC1 $\beta$ ;  $n = 6$ . UCP2;  $n = 6$  untreated,  $n = 5$  T4-treated. SREBP1c;  $n = 6$  untreated,  $n = 5$  T4-treated. (D) Western blots indicating activation of AMPK in the skeletal muscle and the liver of T4-treated mice. Mice were fasted for 16 hours prior euthanization.  $n = 5$  per group. (E) Densitometric analysis of the western blots using skeletal muscle extracts shown in Supporting Information Figure S4D. Values were normalized to untreated mice. (F) Densitometric analysis of the western blots using liver extracts shown in Supporting Information Figure S4D. Values were normalized to untreated mice. UT: Untreated; T4: T4-treated. Data are represented as the mean  $\pm$  SEM. \*  $p < 0.05$  compared to untreated mice ( $t$ -test two tailed).

**Supporting Information Figure S5. T4 supplementation increased circulating T4, alters organs weight and modulates insulin signaling in immunized RIP-B7.1 mice.**

(A) Circulating T4 levels in fed conditions.  $n = 9$  untreated;  $n = 8$  T4-treated. (B) Organs weight divided by body weight.  $n = 6$  untreated;  $n = 9$  T4-treated. (C) Western blots showing the amount of phospho-tyrosine 632 IRS1, total IRS1 and GAPDH, used as loading control, in the skeletal muscle and the liver of T4-treated mice. Skeletal muscle  $n = 6$  untreated,  $n = 5$  T4-treated. Liver  $n = 6$  per group. (D) Densitometric analysis of the western blots using skeletal muscle extracts shown in Supporting

Information Figure S5C. Values were normalized to untreated mice. (E) Densitometric analysis of the western blots using liver extracts shown in Supporting Information Figure S5C. Values were normalized to untreated mice. UT: Untreated; T4: T4-treated. Data are represented as the mean  $\pm$  SEM. \*  $p < 0.05$  compared to untreated mice ( $t$ -test two tailed).

**Supporting Information Figure S6. T4-treated and untreated immunized RIP-B7.1 mice show similar degree of insulinitis.** (A) Representative images of immune infiltrations in T4-treated and untreated immunized RIP-B7.1 mice. (B) Insulinitis was scored as grade 0–4 according to the percentage of infiltrated islet area (0: 0%; 1: <10%; 2: >10% and <55%; 3: >55% and <75%; 4: >75%). Scale bar = 50  $\mu$ m.  $n = 5$  per group. UT: Untreated; T4: T4-treated. Data are represented as the mean  $\pm$  SEM. \*  $p < 0.05$  compared to untreated mice ( $t$ -test two tailed).

**Supporting Information Table S1. Antibodies used in this study.**

| <b>Antibody</b>                    | <b>Dilution</b>         | <b>Vendor</b>               | <b>Catalog number</b> |
|------------------------------------|-------------------------|-----------------------------|-----------------------|
| Anti-Ki67                          | 1:150                   | Leica Microsystems          | NCL-L-Ki67-MM1        |
| Biotin-rabbit anti-mouse           | 1:300                   | Sigma-Aldrich               | B8520                 |
| Alexa fluor 555 donkey anti-mouse  | 1:800                   | Life technologies           | A31579                |
| Alexa fluor 647 donkey anti-rabbit | 1:800                   | Life technologies           | A31573                |
| Anti-insulin (H-86)                | 1:500                   | Santa Cruz<br>Biotechnology | SC9168                |
| Anti-insulin                       | 1:500                   | Sigma-Aldrich               | I2018                 |
| Anti-glucagon                      | 1:150                   | Sigma-Aldrich               | G2654                 |
| Anti-MAFA                          | 1:200                   | Bethyl Laboratories         | IHC-00352             |
| Anti-GK                            | 1:50                    | Santa Cruz<br>Biotechnology | SC-7908               |
| Anti-IR- $\beta$                   | 1:200                   | Santa Cruz<br>Biotechnology | SC-711                |
| Anti-IRS1                          | 1:200                   | Santa Cruz<br>Biotechnology | SC-599                |
| Anti-pTyr 632 IRS1                 | 1:200                   | Santa Cruz<br>Biotechnology | SC-17196              |
| Anti-PI3K                          | 1:1000                  | Cell Signaling              | 4292                  |
| Anti-pSer473 AKT                   | 1:500                   | Cell Signaling              | 9271                  |
| Anti-AKT                           | 1:1000                  | Cell Signaling              | 9272                  |
| Anti-pSer256 FOXO1                 | 1:300                   | Cell Signaling              | 9461                  |
| Anti-FOXO1                         | 1:1000 WB;<br>1:100 IHC | Cell Signaling              | 2880                  |
| Anti-GSK3 $\beta$                  | 1:200                   | Santa Cruz<br>Biotechnology | SC-9166               |
| Anti-pThr202/pTyr204 ERK           | 1:1000                  | Cell Signaling              | 9106                  |
| Anti-ERK                           | 1:1000                  | Cell Signaling              | 9102                  |

|                       |        |                |       |
|-----------------------|--------|----------------|-------|
| Anti-GAPDH            | 1:1000 | Cell Signaling | 2118  |
| Anti-pThr172 AMPK     | 1:1000 | Cell Signaling | 2535  |
| Anti-AMPK             | 1:1000 | Cell Signaling | 2532  |
| HRP-goat anti-rabbit  | 1:5000 | Sigma-Aldrich  | A0545 |
| HRP-rabbit anti-mouse | 1:5000 | Sigma-Aldrich  | A9044 |
| HRP-rabbit anti-goat  | 1:5000 | Sigma-Aldrich  | A5420 |

WB: Western blot; IHC: Immunohistochemistry.

**Supporting Information Table S2. Primer pair sequences used for quantitative RT-PCR analysis.**

| <b>Gene</b>    | <b>Forward primer sequence</b>         | <b>Reverse primer sequence</b>    |
|----------------|----------------------------------------|-----------------------------------|
| MAFA           | 5'-CAGCAGCGGCACATTCTG-3'               | 5'-GCCCGCCAACCTTCTCGTAT-3'        |
| IR- $\beta$    | 5'-ACCCTGGACCCAATACGC-3'               | 5'-CCATTGGGGTCAGAGGGG-3'          |
| IRS1           | 5'-GGCAGGGGAGGACTTGAG-3'               | 5'-CTGCCTCGGAGTTCAGCT-3'          |
| AKT            | 5'-AGGTAGCTGTCAACAAGGCA-3'             | 5'-CTTGCCGAGGAGTTTGAGA-3'         |
| FOXO1          | 5'-GAGAAGAGGCTCACCTGTC-3'              | 5'-ACAGATTGTGGCGAATTGAA-3'        |
| GSK3- $\beta$  | 5'-CCGGCTAACACCACTGGA-3'               | 5'-GTCCACGGTCTCCAGCAT-3'          |
| ERK            | 5'-GCTCACCTTACCTGGAACA-3'              | 5'-GGACCAGATCCAAAAGGACA-3'        |
| GLUT2          | 5'-TTGACTGGAGCCCTCTTGATG-3'            | 5'-CACTTCGTCCAGCAATGATGA-3'       |
| GK             | 5'-CTTCACCTTCTCCTTCCCTG-3'             | 5'-ATCTCAAAGTCCCCTCTCCT-3'        |
| G6Pase         | 5'-TCTTGTGGTTGGGATTCTGG-3'             | 5'-CGGATGTGGCTGAAAGTTTC-3'        |
| LPK            | 5'-AGTCTTCCCCTTGCTCTACC-3'             | 5'-AATCACCAGATCACCAACTCG-3'       |
| PEPCK          | 5'-CCATCCCAACTCGAGATTCTG-3'            | 5'-CTGAGGGCTTCATAGACAAGG-3'       |
| GAPDH          | 5'-CACCAACTGCTTAGCCCC-3'               | 5'-TCTTCTGGGTGGCAGTGATG-3'        |
| LDH            | 5'-AGTCTCCCGTGCATCCTCAA-3'             | 5'-AGGGTGTCCGCACTCTTCCT-3'        |
| PGC1 $\alpha$  | 5'-<br>GGGTCAGAGGAAGAGATAAAGTTG-<br>3' | 5'-CACCAAACCCACAGAAAACAG-<br>3'   |
| PGC1 $\beta$   | 5'-GTGATAAAACCGTGCTTCTGG-3'            | 5'-GGTGTTCCGGTGAGATTGTAGAG-<br>3' |
| UCP2           | 5'-GCTTGGGATCCTGGAACGT-3'              | 5'-GGCAGCCATTAGGGCTCTTT-3'        |
| SREBP1c        | 5'-GCATGCCATGGGCAAGTAC-3'              | 5'-AGCATCTCCTGCGCACTCA-3'         |
| $\beta$ -actin | 5'-GGACCAGATCCAAAAGGACA-3'             | 5'-GCTCACCTTACCTGGAACA-3'         |

Supporting Information Figure S1

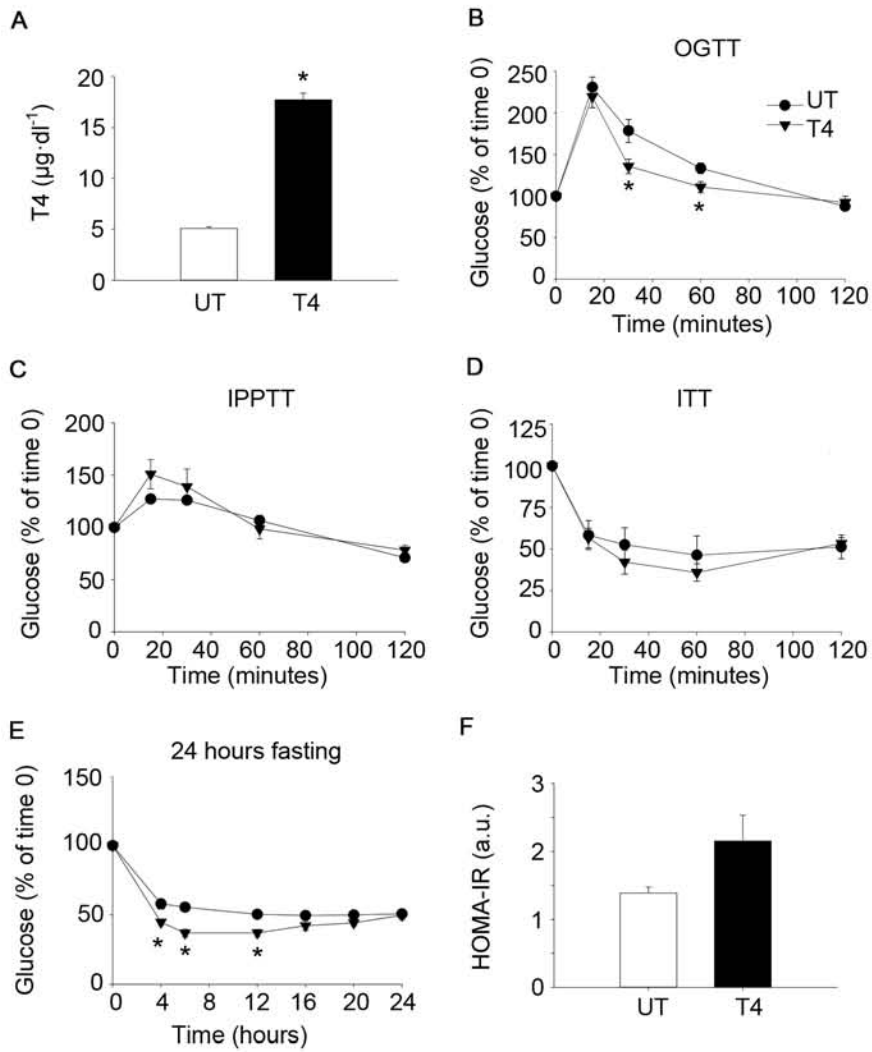

Supporting Information Figure S2

A

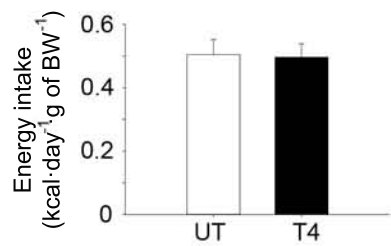

B

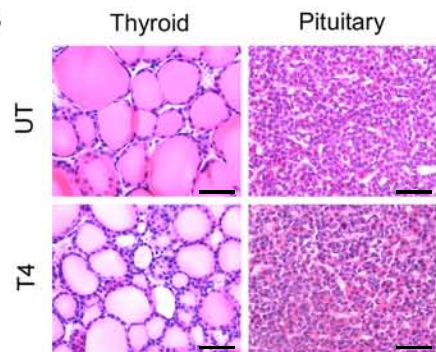

C

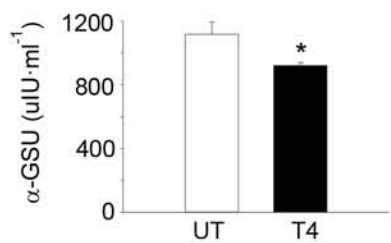



Supporting Information Figure S3

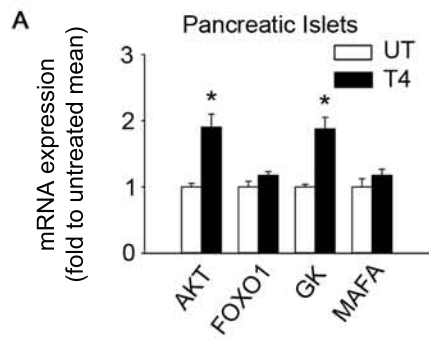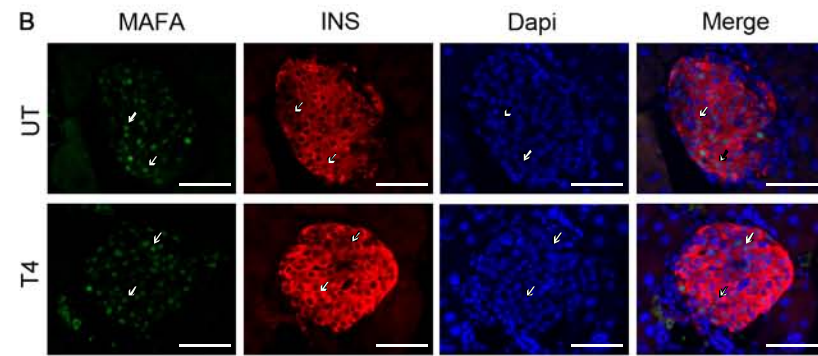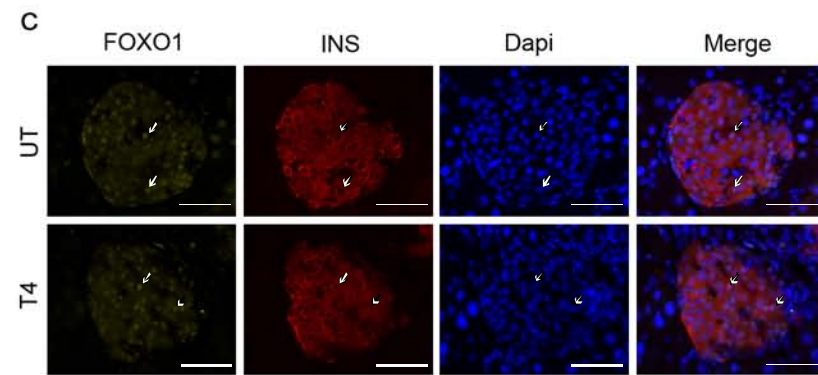

Supporting Information Figure S4

A

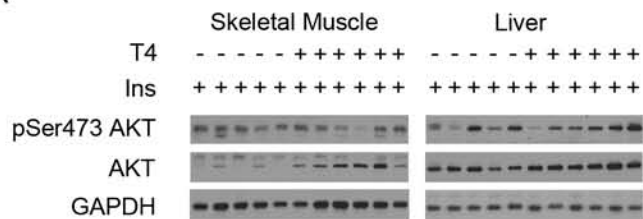

B

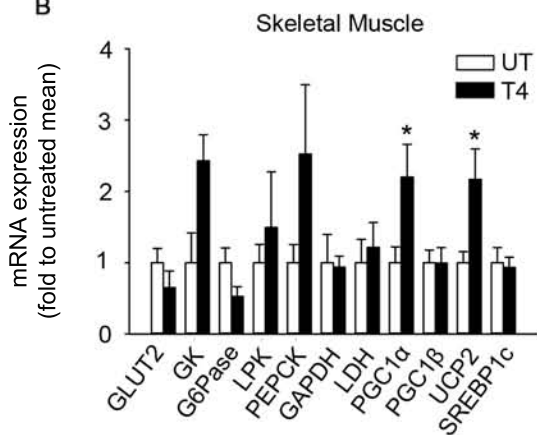

C

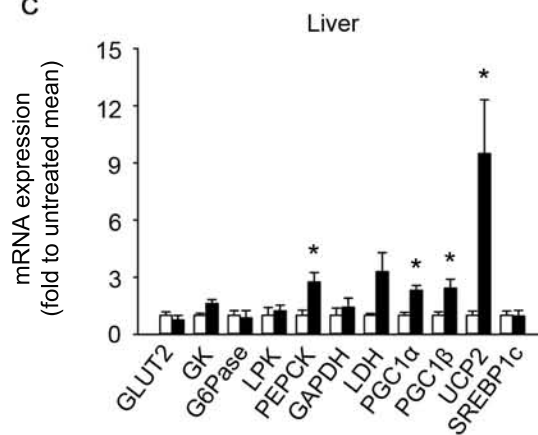

D

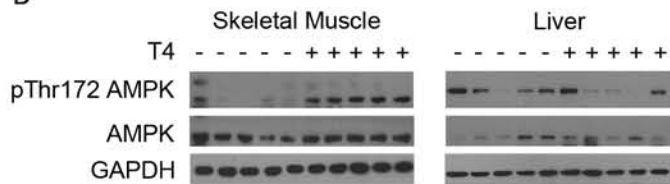

E

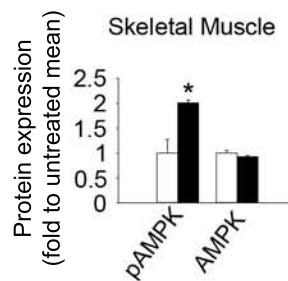

F

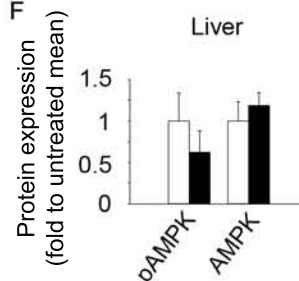

Supporting Information Figure S5

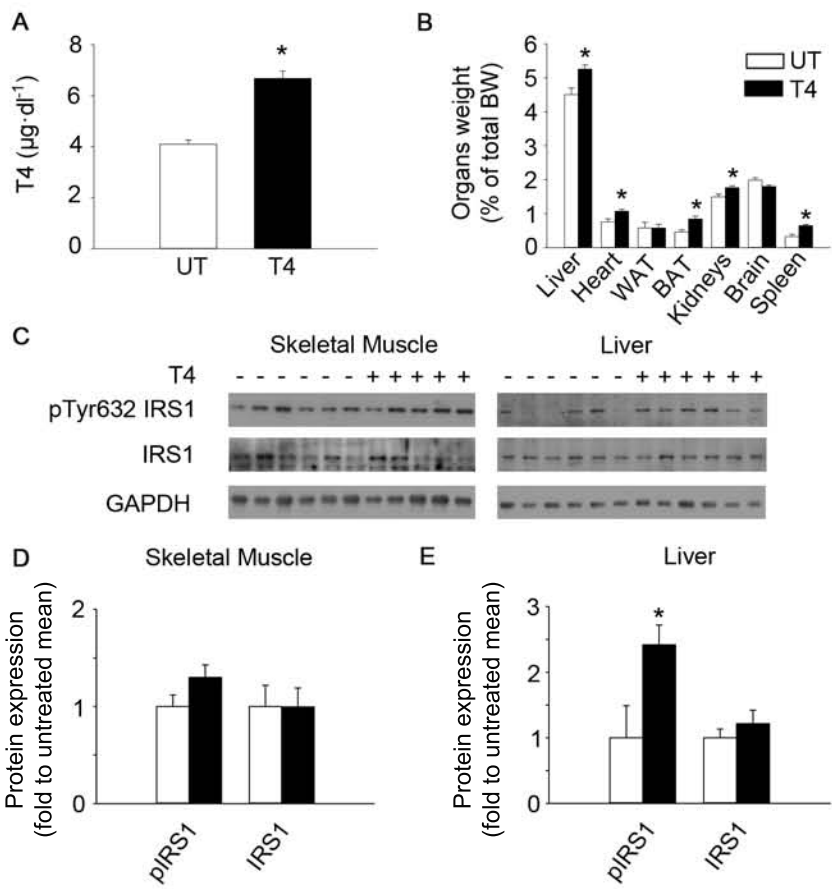

Supporting Information Figure S6

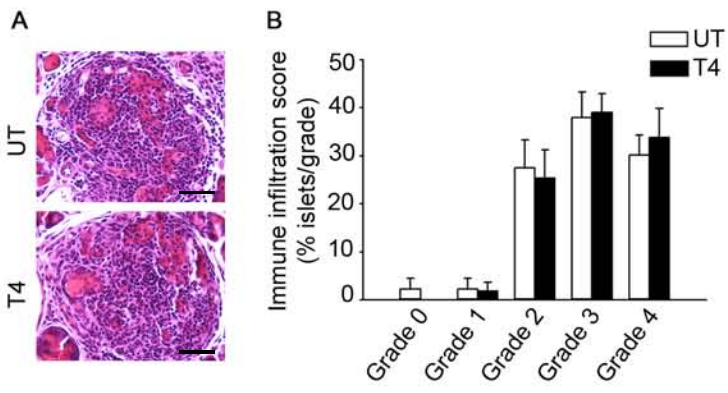

Supplement: BPH-174-3795-s001.pdf [file BPH-174-3795-s001.pdf]
